# Supplementary material
Source: publisher site journal article supplement (https://static.cambridge.org/content/id/urn:cambridge.org:id:article:S1047951122003559/resource/name/S1047951122003559supp001.docx)
Supplement: Supplementary file 1 [file S1047951122003559supp001.docx]

Supplemental Table 1: Database searches. PubMed search conducted on 9/18/2021. SCOPUS and EMBASE searches conducted on 9/28/2021.

| PubMed Search Term | | Results |
| --- | --- | --- |
| 1 | ("Pediatrics"[Mesh] OR pediatric[tiab] OR pediatrics[tiab] OR paediatric[tiab] OR paediatrics[tiab] OR juvenile[tiab] OR juveniles[tiab] OR "Infant"[Mesh] OR infant[tiab] OR infants[tiab] OR infantile[tiab] OR "Child"[Mesh] OR child[tiab] OR children[tiab] OR childhood[tiab] OR preadolescent[tiab] OR preadolescents[tiab] OR prepubescent[tiab] OR "Adolescent"[Mesh] OR adolescent[tiab] OR adolescents[tiab] OR youth[tiab] OR youths[tiab] OR teenager[tiab] OR teenagers[tiab] OR teenage[tiab] OR teen[tiab] OR teens[tiab]) NOT ("Adult"[Mesh] NOT ("Adolescent"[Mesh] OR "Child"[Mesh] OR "Infant"[Mesh])) | 4,234,843 |
| 2 | (“postoperative period"[mesh] OR "Postoperative Care"[mesh] OR "postoperative complications"[mesh] OR postoperative[tiab])) AND ("Cardiac Surgical Procedures"[Mesh] OR "Cardiopulmonary Bypass"[Mesh] OR "cardiac surgery"[tiab] OR "cardiac surgeries"[tiab] OR "heart surgery"[tiab] OR "heart surgeries"[tiab] OR "cardiopulmonary bypass"[tiab] OR "cardiac surgical procedures"[tiab] OR "cardiac surgical procedure"[tiab] OR cardio surgery[tiab])) | 80,576 |
| 3 | 1 AND 2 AND (English[lang] AND ("2000"[Date - Entrez] : "2021"[Date - Entrez]) | 9,472 |
| 4 | 3 AND (analgesics[mesh] OR analgesics[Pharmacological Action] OR analgesic[tiab] OR analgesics[tiab]) | 269 |
| 5 | 3 AND (analgesia[mesh] OR analgesia[Pharmacological Action] OR analgesia[tiab] OR analgesia[tiab]) | 113 |
| 6 | 3 AND (pain[mesh] OR pain[Pharmacological Action] OR pain[tiab]) | 256 |

| EMBASE Search Term | | Results |
| --- | --- | --- |
| 1 | ([infant]/lim OR [child]/lim OR [adolescent]/lim OR pediatric:ti,ab OR pediatrics:ti,ab OR paediatric:ti,ab OR paediatrics:ti,ab OR juvenile:ti,ab OR juveniles:ti,ab OR infant:ti,ab OR infants:ti,ab OR infantile:ti,ab OR child:ti,ab OR children:ti,ab OR childhood:ti,ab OR preadolescent:ti,ab OR preadolescents:ti,ab OR prepubescent:ti,ab OR adolescent:ti,ab OR adolescents:ti,ab OR youth:ti,ab OR youths:ti,ab OR teenager:ti,ab OR teenagers:ti,ab OR teenaged:ti,ab OR teen:ti,ab OR teens:ti,ab) NOT (([young adult]/lim OR [adult]/lim OR [middle aged]/lim OR [aged]/lim OR [very elderly]/lim) NOT ([embryo]/lim OR [fetus]/lim OR [newborn]/lim OR [infant]/lim OR [child]/lim OR [adolescent]/lim)) | 4,219,954 |
| 2 | ('postoperative period'/exp OR postoperative:ti,ab) AND ('heart surgery'/exp OR 'cardiopulmonary bypass'/exp OR 'cardiac surgery':ti,ab OR 'cardiac surgeries':ti,ab OR 'heart surgery':ti,ab OR 'heart surgeries':ti,ab OR 'cardiopulmonary bypass':ti,ab OR 'cardiac surgical procedures':ti,ab OR 'cardiac surgical procedure':ti,ab OR cardiosurgery:ti,ab OR cardiosurgeries:ti,ab) | 83,967 |
| 3 | ('randomized controlled trial'/exp OR 'crossover procedure'/exp OR 'double blind procedure'/exp OR 'single blind procedure'/exp OR random*:ab,ti OR factorial*:ab,ti OR crossover*:ab,ti OR ((cross NEAR/1 over*):ab,ti) OR placebo*:ab,ti OR ((doubl* NEAR/1 blind*):ab,ti) OR ((singl* NEAR/1 blind*):ab,ti) OR assign*:ab,ti OR allocat*:ab,ti OR volunteer*:ab,ti OR 'clinical study'/exp OR 'clinical trial':ti,ab OR 'clinical trials':ti,ab OR 'controlled study'/exp OR 'evaluation'/exp OR 'evaluation study':ab,ti OR 'evaluation studies':ab,ti OR 'intervention study':ab,ti OR 'intervention studies':ab,ti OR 'case control':ab,ti OR 'cohort analysis'/exp OR cohort:ab,ti OR longitudinal*:ab,ti OR prospective:ab,ti OR prospectively:ab,ti OR retrospective:ab,ti OR 'follow up'/exp OR 'follow up':ab,ti OR 'comparative effectiveness'/exp OR 'comparative study'/exp OR 'comparative study':ab,ti OR 'comparative studies':ab,ti OR 'evidence based medicine'/exp OR 'systematic review':ab,ti OR 'meta-analysis':ab,ti OR 'meta-analyses':ab,ti) NOT ('case report'/exp OR 'case study'/exp OR 'editorial'/exp OR 'letter'/exp OR 'note'/exp OR 'conference abstract'/exp) | 14,439,016 |
| 4 | [2000-2021]/py AND [embase]/lim AND [humans]/lim AND [english]/lim | 12,929,268 |
| 5 | 1 AND 2 AND 3 AND 4 | 443 |
| 6 | 5 AND ('pain'/dm OR 'postoperative pain'/dm) | 78 |
| 7 | 5 AND ('analgesia'/dm OR 'analgesic'/dm) | 68 |

| SCOPUS Search Term | | Results |
| --- | --- | --- |
| 1 | ( TITLE-ABS-KEY ( pediatric OR pediatrics OR paediatric OR paediatrics OR juvenile OR juveniles OR infant OR infants OR infantile OR child OR children OR childhood OR preadolescent OR preadolescents OR prepubescent OR adolescent OR adolescents OR youth OR youths OR teenager OR teenagers OR teenage OR teen OR teens ) | 5,457,252 |
| 2 | ( TITLE-ABS-KEY ( "heart surgery" OR "cardiac surgery" OR "cardiothoracic surgery" ) | 125,776 |
| 3 | ( TITLE-ABS-KEY ( postoperative OR "postoperative period" OR "post-operative" OR "post-operative period" ) | 1,190,601 |
| 4 | 1 AND 2 AND 3 | 12,005 |
| 5 | 4 AND ( TITLE-ABS-KEY ( analgesia OR analgesic OR analgesics OR pain ) | 571 |
| 6 | 5 AND LANGUAGE ( english ) ) AND PUBYEAR > 1999 AND (( LIMIT-TO ( DOCTYPE , "ar" ) OR LIMIT-TO ( DOCTYPE , "re" ) OR LIMIT-TO ( DOCTYPE , "ch" ) ) AND ( LIMIT-TO ( LANGUAGE , "English" ) ) | 412 |
